# Supplementary material
Source: PubMed Central journal article supplement (PMC6595072)
Supplement: NIHMS83644-supplement-01.pdf [file NIHMS83644-supplement-01.pdf]

## **Supplemental Data**

### **CDYL Bridges REST and Histone Methyltransferases for Gene Repression and Suppression of Cellular Transformation**

**Peter Mulligan, Thomas F. Westbrook, Matthias Ottinger, Natalya Pavlova, Bin Chang, Eric Macia, Yu-Jiang Shi, Jordi Barretina, Jinsong Liu, Peter M. Howley, Stephen J. Elledge, and Yang Shi**

#### **Supplemental Experimental Procedures**

##### **Recombinant Protein Purification**

Human CDYL isoform 2 was expressed in *E. coli* as a GST-fusion using pGEX4T1 (Amersham Biosciences), and purified with GSH-agarose beads (Sigma). Cell lysis and washing buffer contained 500 mM NaCl, 1 mM EDTA, 50 mM Tris-HCl pH 8, 1 mM DTT, 1 mM PMSF and Complete Protease Inhibitor Cocktail (Roche). N-terminal Flag-tagged human G9a and EuHMT1 cDNAs (a gift from Yoshihiro Nakatani), were expressed in baculovirus transduced SF9 cells using the Bac-to-Bac expression system (Invitrogen), purified using anti-Flag M2 Agarose beads and eluted with Flag peptide. Cell lysis, bead washing and peptide elution buffer contained 300 mM NaCl, 50 mM Tris-HCl (pH 7.9), 1 mM EDTA, 0.2% Triton X-100, 1 mM DTT, 1 mM PMSF and Complete Protease Inhibitor Cocktail (Roche). HA-tagged human REST cDNA was and expressed in SF9 cells using the Bac-N-Blue expression system (Invitrogen). Protein was purified using anti-HA agarose (Santa Cruz Biotechnology) as per Flag-G9a/EMT protocol, and eluted with HA peptide. Purified recombinant His6-tagged human CoREST was a gift from Jian Oyang and Grace Gill.

### **ChIP PCR Primers**

TrkC RE1 Forward (CTTACTCAACTCCCAGCCTCC)

TrkC RE1 Reverse (AGCTGTTCATAGTTCACTGCCC)

NPTXR RE1 Forward (CTGCTGCCTTGTGCCCTTCA)

NPTXR RE1 Reverse (CAGAACAGGGCTGCCCAATG)

GAPDH Promoter Forward (ACCACAGTCCATCCCATCAC)

GAPDH Promoter Reverse (TCCACCACCCTGTTGCTGTA).

## Supplemental Figures and Table

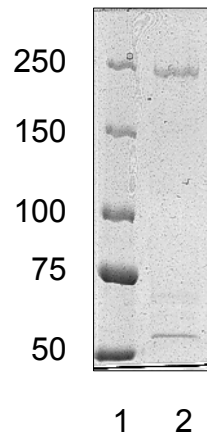

**Figure S1. Purified Recombinant Flag-REST**

Shown is a coomassie blue-stained SDS-PAGE gel of Flag-REST purified from Sf9 cells (lane 2). Molecular weight markers are in lane 1.

**a**

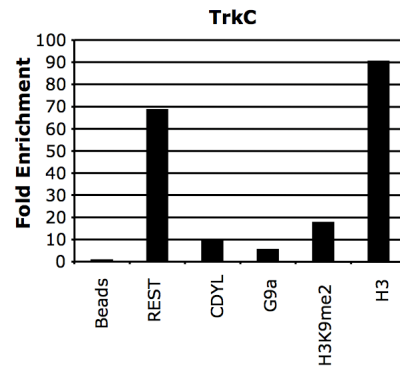

**b**

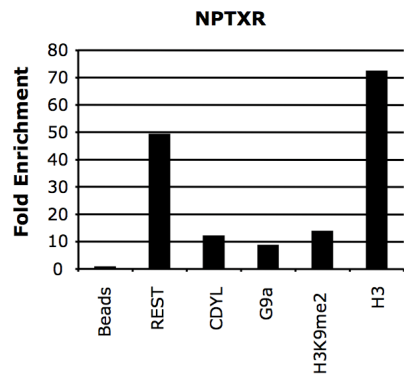

**c**

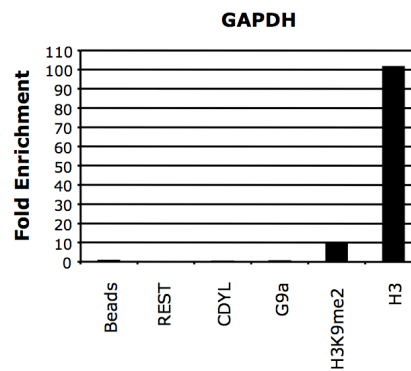

**Figure S2. Enrichment of REST, CDYL, G9a and H3K9me2 at TrkC and NPTXR RE1 Site-Proximal Chromatin**

Quantitative PCR was used to analyze the occupancy of TrkC and NPTXR RE1 site-proximal chromatin by REST, CDYL, G9a, H3K9me2 and H3. GAPDH promoter was used as a control. **(a, b)** TrkC RE1 site-proximal chromatin is enriched in REST, CDYL, G9a, H3K9me2 and H3, relative to beads alone. **(c)** GAPDH promoter showed no enrichment in REST, CDYL and G9a, while moderate enrichment of H3K9me2 and strong enrichment of H3 were observed.

Samples are expressed as fold-enrichment, relative to background PCR amplification from the beads alone control ChIP. Assay was repeated three times with similar results.

**Table S1.** Summary of Mass Spectrometry Analysis of Proteins Associated with Tandem-Affinity-Purified CDYL

<sup>a</sup>SDS-PAGE was used to resolve CDYL-associated proteins. Proteins eluted from gel slices were then trypsin-digested and fragments analyzed by MS-MS.

<sup>b</sup>Ions score is  $-10 \cdot \log(P)$ , where P is the probability that the observed match is a random event as indicated by using MASCOT software (Matrixscience, London, UK). An individual Sample Ions Score greater than the Threshold Positive Ions Score for that sample indicates identity or extensive protein homology ( $p < 0.05$ ). In these cases, sample identity is confidently assigned.

| <b>Identified Protein</b>          | <b>Accession (gi)</b> | <b>Number of Peptides Identified <sup>a</sup></b> | <b>Threshold Positive Ions Score <sup>b</sup></b> | <b>Sample Ions Score <sup>b</sup></b> | <b>Confident Assignment of Identity (p&lt;0.05) <sup>b</sup></b> |
|------------------------------------|-----------------------|---------------------------------------------------|---------------------------------------------------|---------------------------------------|------------------------------------------------------------------|
| BAF200/ARID-2/Jumonji              | 42659931              | 1                                                 | 40                                                | 42                                    | Yes                                                              |
| hAM/MCAF/ATF-7 interacting protein | 29611342              | 11                                                | 42                                                | 273                                   | Yes                                                              |
| Polybromo-1                        | 93102371              | 9                                                 | 42                                                | 127                                   | Yes                                                              |
| Brg1/SNF2-like 2                   | 1711406               | 3                                                 | 42                                                | 36                                    | No                                                               |
| REST                               | 15559211              | 22                                                | 42                                                | 475                                   | Yes                                                              |
| SETDB1/ESET                        | 25091210              | 5                                                 | 42                                                | 69                                    | Yes                                                              |
| KIAA1221                           | 6330604               | 7                                                 | 42                                                | 112                                   | Yes                                                              |
| ZNF644                             | 45946796              | 5                                                 | 42                                                | 100                                   | Yes                                                              |
| G9a iosform a                      | 18373637              | 36                                                | 42                                                | 1015                                  | Yes                                                              |
| EHMT1/EuHMTase1                    | 40217808              | 20                                                | 42                                                | 539                                   | Yes                                                              |
| BAF170                             | 15341763              | 1                                                 | 42                                                | 31                                    | No                                                               |
| G9a isoform b                      | 18426879              | 24                                                | 42                                                | 785                                   | Yes                                                              |
| WIZ 135 Kda isoform                | 51474998              | 7                                                 | 42                                                | 119                                   | Yes                                                              |
| WIZ 125 Kda isoform                | 42661989              | 25                                                | 42                                                | 616                                   | Yes                                                              |
| WIZ 115 kDa isoform                | 42661989              | 23                                                | 42                                                | 559                                   | Yes                                                              |
| MI-ER2                             | 45267839              | 8                                                 | 44                                                | 193                                   | Yes                                                              |
| lamin A/C                          | 27436948              | 3                                                 | 44                                                | 95                                    | Yes                                                              |
| MI-ER1                             | 21702659              | 22                                                | 41                                                | 531                                   | Yes                                                              |
| CDYL                               | 38494365              | 25                                                | 55                                                | 630                                   | Yes                                                              |
| HDAC1                              | 13128860              | 7                                                 | 42                                                | 120                                   | Yes                                                              |
| HDAC2                              | 68068066              | 16                                                | 42                                                | 279                                   | Yes                                                              |
| SNF5/INI1                          | 3326993               | 1                                                 | 44                                                | 65                                    | Yes                                                              |
| CDYL, isoform c                    | 25777621              | 5                                                 | 44                                                | 126                                   | Yes                                                              |
